# Supplementary material
Source: PubMed Central journal article supplement (PMC4419745)
Supplement: NIHMS682141-supplement-Supplemental_Figures.pdf [file NIHMS682141-supplement-Supplemental_Figures.pdf]

**An On-line Matrix Removal Platform for Coupling Gel-Based Separations to  
Whole Protein Electrospray Ionization Mass Spectrometry**

*Ki Hun Kim, Philip D. Compton, John C. Tran and Neil L. Kelleher\**

Departments of Chemistry, Molecular Biosciences and the Proteomics Center of Excellence,  
Northwestern University, 2145 N. Sheridan Road, Evanston, IL 60208, United States

**Supporting Information**

Supplementary Table 1 and 2

Supplementary Figure 1 and 2

Supplementary Table 1. The relative ratio of peak area for comparison between precipitation and the new matrix removal platform. The peak area from each protein standard obtained with the in-line device was set to 100%.

| <b>Protein</b>     | <b>Precipitation/Removal device<br/>(Std. Dev.)</b> |
|--------------------|-----------------------------------------------------|
| Ubiquitin          | 29% (8.4%)                                          |
| Myoglobin          | 55% (1.4%)                                          |
| Carbonic Anhydrase | 10% (24.4%)                                         |
| Transferrin        | 17% (49.5%)                                         |

Supplementary Table 2. The mass accuracy of each histone subunit identified from high-resolution tandem mass spectrometry. All four subunits were observed within a 10 ppm mass tolerance. Molecular weight values are reported for the neutral, most abundant isotopic peak.

| <b>Histone subunit</b> | <b>Theoretical MW (Da)</b> | <b>Observed MW (Da)</b> | <b>Mass error (Da)</b> | <b>ppm</b> | <b>Representative E-value</b> |
|------------------------|----------------------------|-------------------------|------------------------|------------|-------------------------------|
| H2A                    | 14004.30                   | 14004.38                | -0.08                  | -5.7       | $4 \times 10^{-11}$           |
| H2B                    | 13774.95                   | 13774.97                | -0.02                  | -1.5       | $3 \times 10^{-18}$           |
| H3                     | 15272.89                   | 15272.92                | -0.03                  | -2.0       | $9 \times 10^{-14}$           |
| H4                     | 11236.15                   | 11236.22                | -0.07                  | -6.2       | $6 \times 10^{-27}$           |

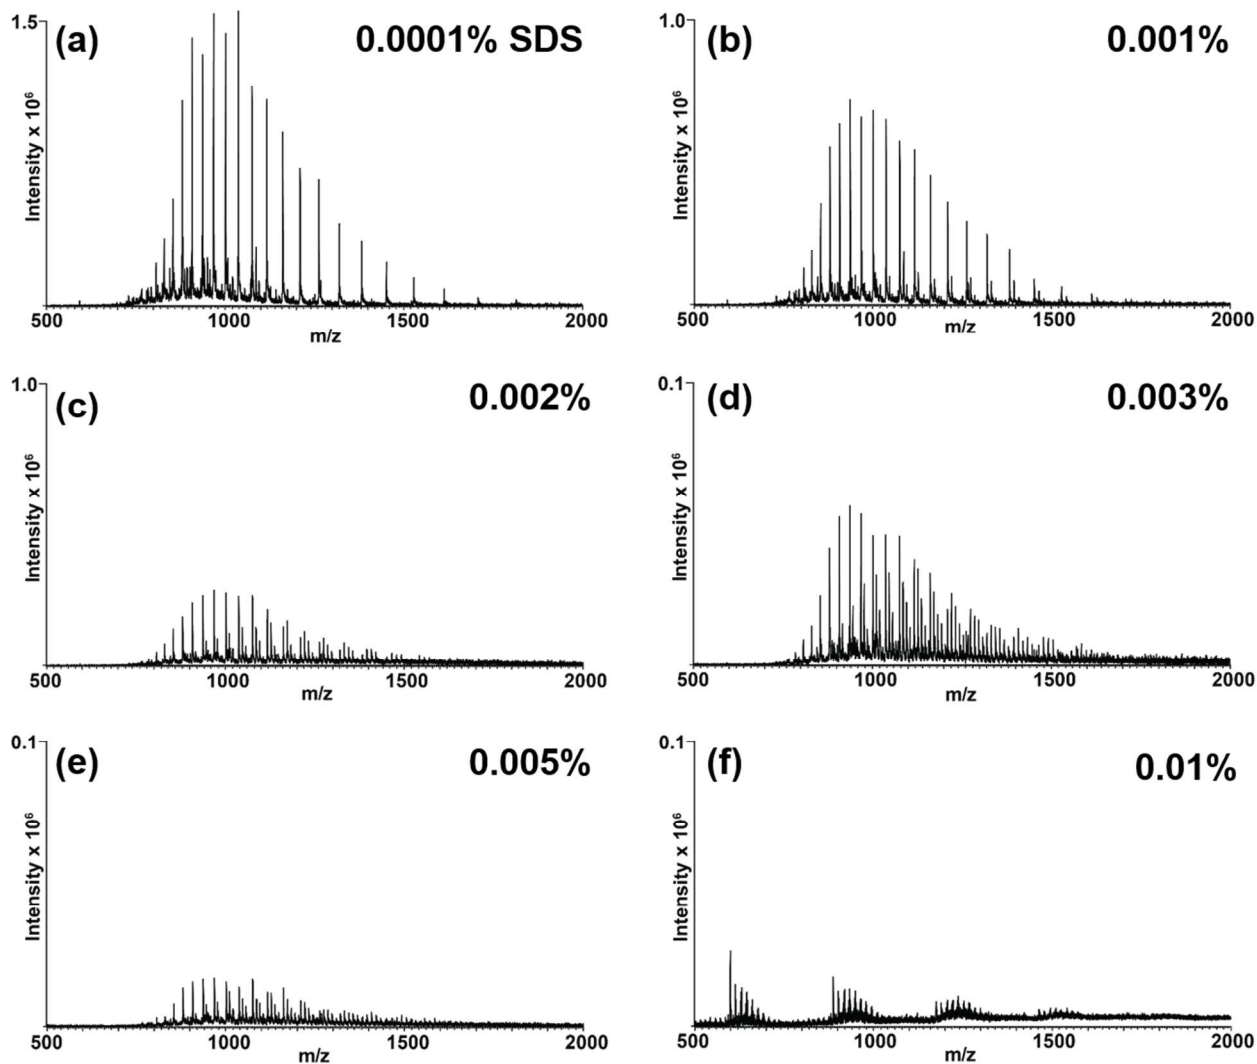

Supplementary Figure 1. The mass spectra of carbonic anhydrase in solutions containing various concentrations of SDS. Carbonic anhydrase was diluted to 0.1 mg/mL (3.4 pmol/ $\mu$ L) in 0.1% formic acid and SDS aqueous solution then introduced directly without a removal device. The mass spectrum from 0.0001% ( $3.47 \times 10^{-6}$  M) of SDS showed no significant adduct peaks or suppression of electrospray ionization in spectrum (a). Adduct peaks by bound SDS and decrease of signal was observed from 0.001% ( $3.47 \times 10^{-5}$  M) of SDS and its effect was increased up to

0.005% in spectra (b)-(e). Above 0.01% ( $3.47 \times 10^{-4}$  M) of SDS concentration, no proteins or SDS adduct peaks were observed and all peaks originated from SDS and sodiated cluster ions,  $[(\text{SDS})_n + \text{Na}]^+$  in spectrum (f).

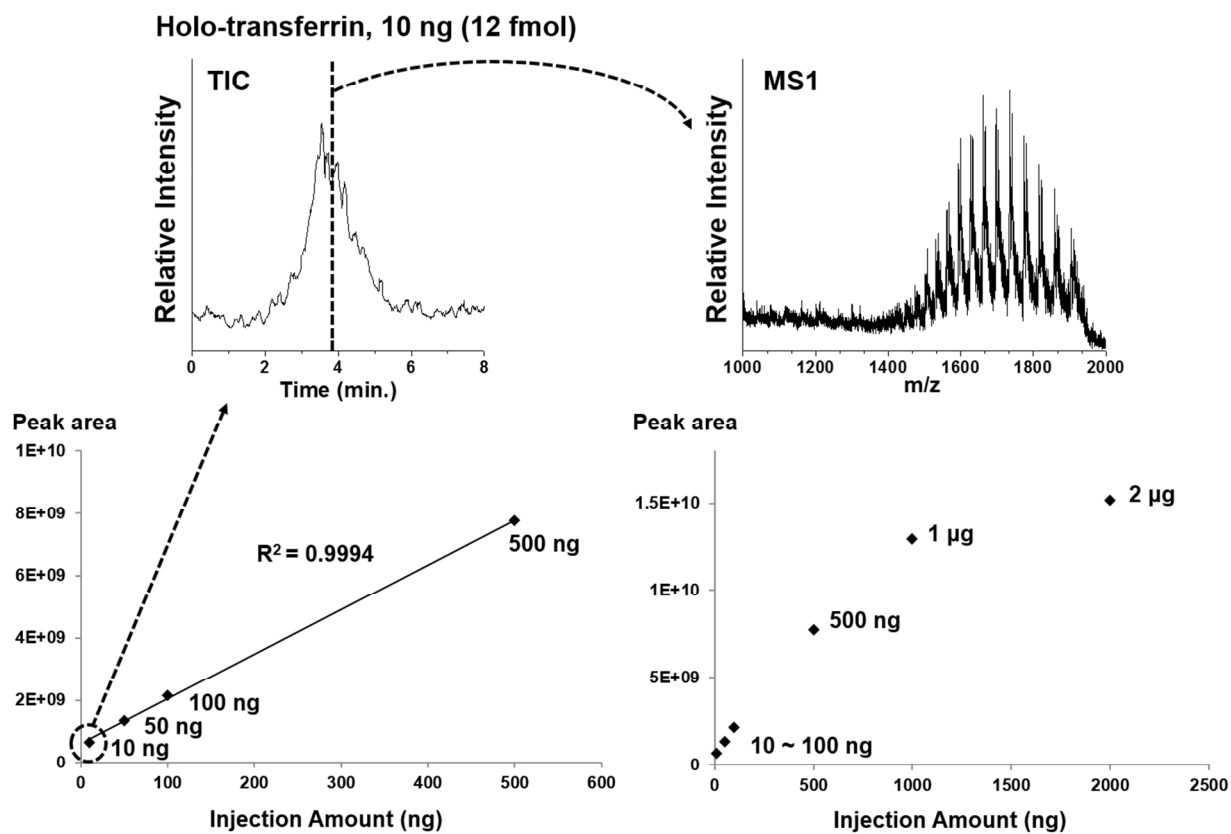

Supplementary Figure 2. The calibration curve of transferrin standard obtained from the matrix removal device and a total ion chromatogram and selected mass spectrum at the center of peak. Good linearity was observed from 10 ng to 500 ng of material injected and the device was able to produce molecular weight information even at the 10 ng level of injection. All of experimental conditions were equal to the experimental conditions as described in the main text.
